# Supplementary material
Source: PubMed Central journal article supplement (PMC4052849)
Supplement: bm500224f_si_001.pdf [file bm500224f_si_001.pdf]

# Supporting information

Decorin Mimic Regulates Platelet-Derived Growth Factor and Interferon- $\gamma$   
Stimulation of Vascular Smooth Muscle Cells

*Rebecca A. Scott<sup>1</sup> and Alyssa Panitch<sup>1\*</sup>*

<sup>1</sup>Weldon School of Biomedical Engineering, Purdue University, West Lafayette, IN 47907

## **Corresponding Author**

apanitch@purdue.edu

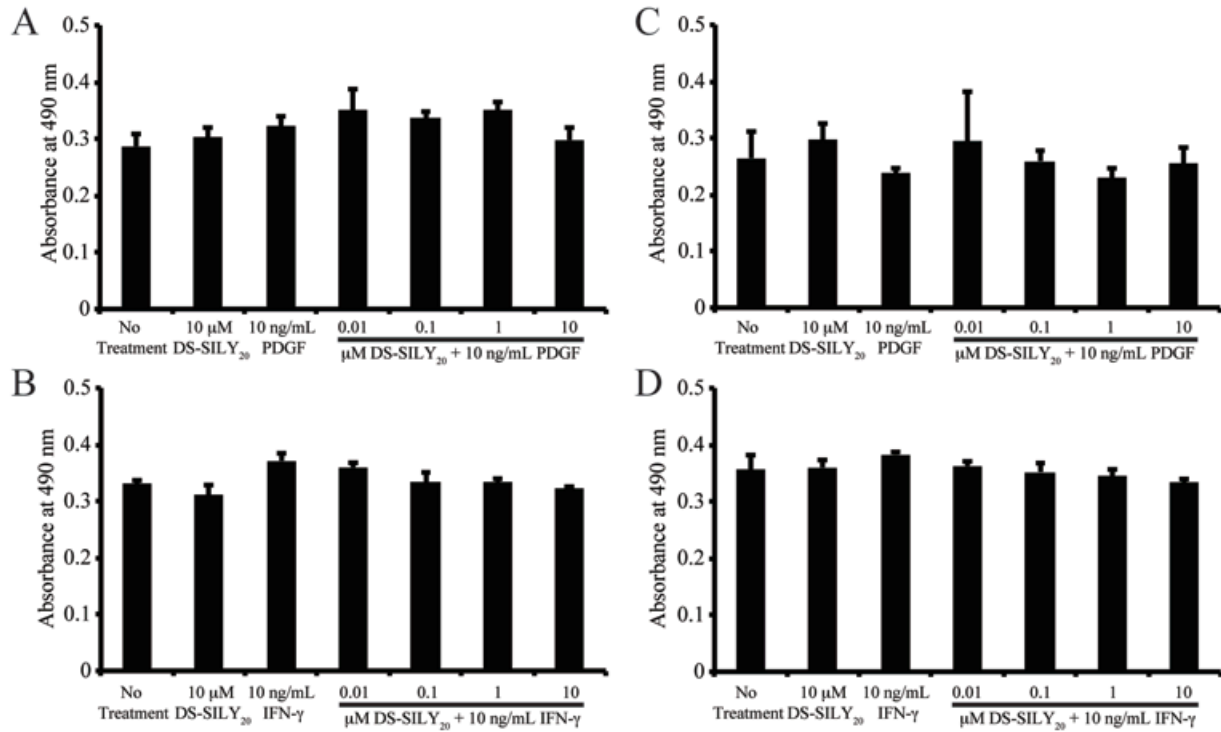

**Figure S1.** SMC metabolic activity is not altered with DS-SILY<sub>20</sub>, PDGF, or IFN- $\gamma$ . Metabolic activity was measured via MTS assay in (A, B) proliferative and (C, D) quiescent SMCs stimulated with 10 ng/mL (A, C) PDGF or (B, D) IFN- $\gamma$ . Cell metabolism was measured 24 hrs post-treatment. (N>6).

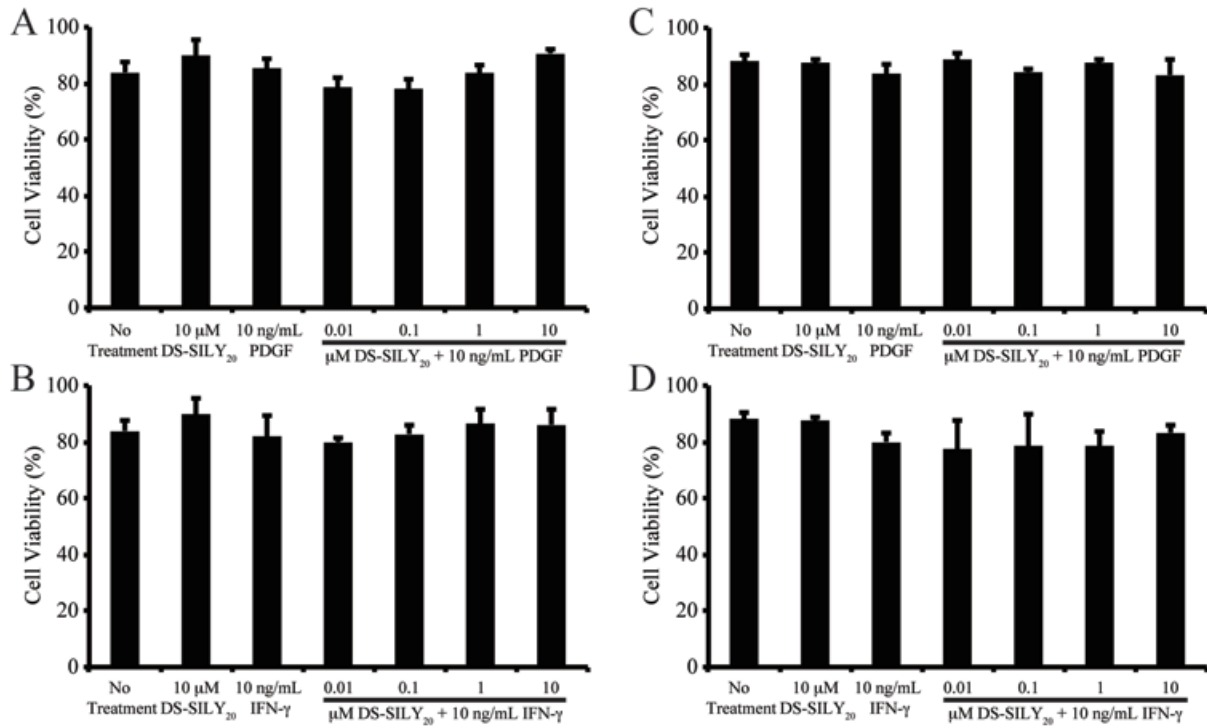

**Figure S2.** SMC viability is not altered with DS-SILY<sub>20</sub>, PDGF, or IFN-γ. Cell viability was measured via Live/Dead assay in (A, B) proliferative and (C, D) quiescent SMCs stimulated with 10 ng/mL (A, C) PDGF or (B, D) IFN-γ. SMC viability was measured 24 hrs post-treatment. (N>6).

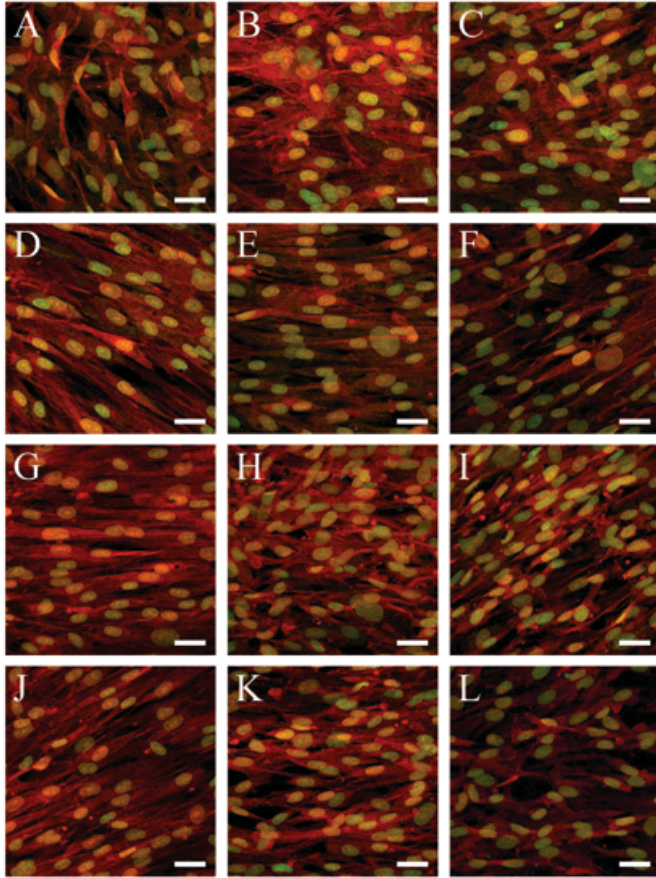

**Figure S3.** Representative images depicting the morphology of (A-F) proliferative and (G-L) quiescent SMCs following treatment with DS-SILY<sub>20</sub>, PDGF, and IFN- $\gamma$ . Cultures were exposed to (A, G) No Treatment, (B, H) 10 ng/mL PDGF, (C, I) 10 ng/mL IFN- $\gamma$ , (D, J) 10  $\mu$ M DS-SILY<sub>20</sub>, (E, K) 10  $\mu$ M DS-SILY<sub>20</sub> and 10 ng/mL PDGF, or (F,L) 10  $\mu$ M DS-SILY<sub>20</sub> and 10 ng/mL IFN- $\gamma$  for 24 hrs. Scale bars = 30  $\mu$ m.

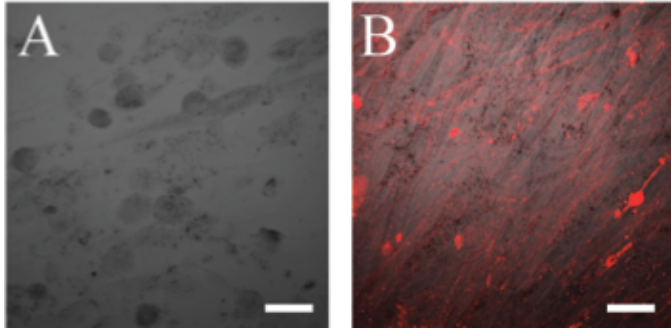

**Figure S4.** DS-SILY<sub>20</sub> binds to the surface of SMCs cultured *in vitro*. SMCs were incubated in the (A) absence or (B) presence of 10  $\mu\text{M}$  DS-SILY<sub>20-biotin</sub> for 15 mins. Following rinsing with PBS, samples were incubated with streptavidin-Dylight 633 (Invitrogen), diluted 1:200 in 1% BSA in PBS, for 20 mins at room temperature with shaking. Plates were then rinsed three times with PBS to remove any unbound streptavidin-Dylight 633 prior to visualization using an Olympus FV1000 confocal microscope with 60x objective. Scans were completed with a xy area of 512  $\mu\text{m}^2$  and one stack, 14  $\mu\text{m}$  (1  $\mu\text{m}$  per step) in the z-direction, was taken at three separate locations in each culture. DS-SILY<sub>20-biotin</sub> was found bound to ECM surrounding the SMCs. Scale bars = 30  $\mu\text{m}$ .
